# Supplementary material
Source: publisher figshare collection journal article supplement (https://tandf.figshare.com/articles/dataset/_/11407218)
Supplement: Supplementary file 1 [file 1]

Archive with 2 entries (2 files):
- lcbi-2019-0247-File007.pdf
- lcbi-2019-0247-File008.pdf
